# Supplementary material for: A New Group of Hepadnaviruses Naturally Infecting
Source: Royal Society of Chemistry journal article supplement (doi:10.1039/c8dt02910e), 1999-01-01
Supplement: c8dt02910e1.pdf [file c8dt02910e1.pdf]

**Supramolecular self-assembly for designing non-centrosymmetric  
crystal based on Keggin polyoxometallates and crown ether**

Jun Xiong,<sup>\*a</sup> Kazuya Kubo,<sup>c</sup> Shao-Fang Lü,<sup>a</sup> Ming Li,<sup>\*a</sup> Takayoshi Nakamura<sup>\*b</sup>

<sup>a</sup>College of Chemistry and Chemical Engineering, Wuhan Textile University, Y.G. Road

No. 1, Wuhan 430200, CHINA.

<sup>b</sup>Research Institute for Electronic Science, Hokkaido University, N20W10, Kita-ku

Sapporo 001-0020 JAPAN.

<sup>c</sup>Graduate School of Material Science, University of Hyogo, Hyogo 678-1205, JAPAN.

**Supporting Information**

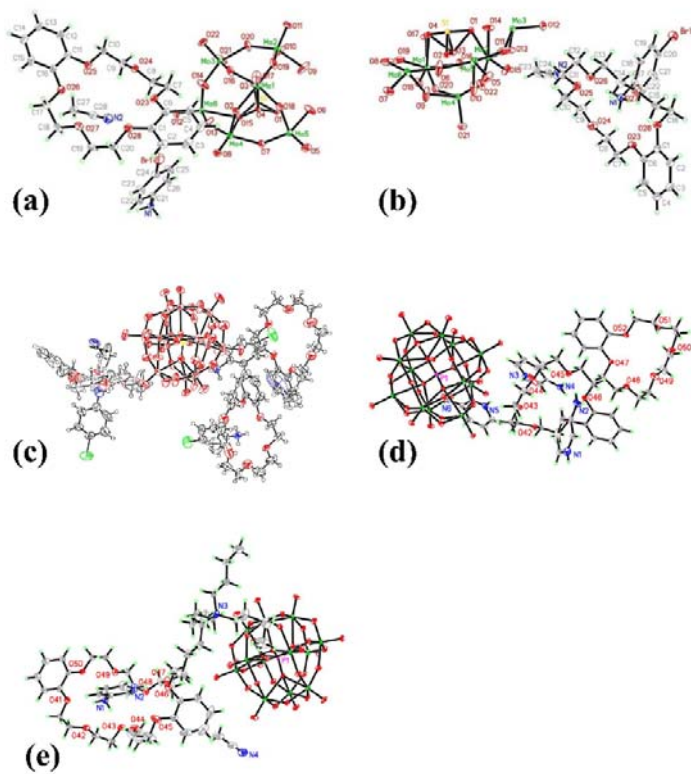

**Figure S1.** ORTEP diagrams of the asymmetric unit of crystals **1 (a)**, **2 (b)**, **3 (c)**, **4 (d)** and **5 (e)**

with the atomic numbering scheme and 30% thermal ellipsoids.

**Table S1.** Weak intermolecular interaction of the crystal **1** (Å, °).

| D–H···A              | d(N–H) | d(H···A) | d(D···A) | ∠DHA |
|----------------------|--------|----------|----------|------|
| N(1)–H(1A)···O(23)   | 0.89   | 2.20     | 2.8043   | 125  |
| N(1)–H(1A)···O(24)   | 0.89   | 2.06     | 2.8953   | 155  |
| N(1)–H(1B)···O(25)   | 0.89   | 2.35     | 2.9355   | 124  |
| N(1)–H(1B)···O(26)   | 0.89   | 2.06     | 2.8912   | 154  |
| N(1)–H(1C)···O(27)   | 0.89   | 2.29     | 2.8868   | 124  |
| N(1)–H(1C)···O(28)   | 0.89   | 1.99     | 2.8304   | 156  |
| C(10)–H(10B)···O(12) | 0.97   | 2.49     | 3.2708   | 137  |
| C(14)–H(14)···O(22)  | 0.93   | 2.56     | 3.2221   | 129  |
| C(17)–H(17A)···O(5)  | 0.97   | 2.36     | 3.1688   | 140  |
| C(17)–H(17B)···O(8)  | 0.97   | 2.27     | 3.1980   | 159  |
| C(20)–H(20A)···O(21) | 0.97   | 2.60     | 3.4760   | 151  |
| C(20)–H(20B)···O(17) | 0.97   | 2.46     | 3.1950   | 133  |

**Table S2.** Weak intermolecular interaction of the crystal **2** (Å, °).

| D–H···A              | d(N–H) | d(H···A) | d(D···A) | ∠DHA |
|----------------------|--------|----------|----------|------|
| N(1)–H(1A)···O(23)   | 0.89   | 2.25     | 3.0123   | 144  |
| N(1)–H(1A)···O(24)   | 0.89   | 2.26     | 2.9831   | 138  |
| N(1)–H(1B)···O(25)   | 0.89   | 2.03     | 2.7979   | 144  |
| N(1)–H(1B)···O(26)   | 0.89   | 2.28     | 2.9673   | 134  |
| N(1)–H(1C)···O(27)   | 0.89   | 2.04     | 2.8294   | 147  |
| N(1)–H(1C)···O(28)   | 0.89   | 2.18     | 2.8037   | 126  |
| C(16)–H(16A)···O(19) | 0.97   | 2.53     | 3.4395   | 157  |

**Table S3.** Weak intermolecular interaction of the crystal **3** (Å, °).

| D–H···A              | d(N–H) | d(H···A) | d(D···A) | ∠DHA |
|----------------------|--------|----------|----------|------|
| N(1)–H(1A)···O(43)   | 0.89   | 2.56     | 2.8755   | 102  |
| N(1)–H(1A)···O(44)   | 0.89   | 2.29     | 3.1432   | 160  |
| N(1)–H(1A)···O(45)   | 0.89   | 2.53     | 3.0097   | 114  |
| N(1)–H(1B)···O(41)   | 0.89   | 2.53     | 2.9031   | 106  |
| N(1)–H(1B)···O(46)   | 0.89   | 2.99     | 2.8714   | 172  |
| N(1)–H(1C)···O(41)   | 0.89   | 2.54     | 2.9013   | 105  |
| N(1)–H(1C)···O(42)   | 0.89   | 2.04     | 2.9219   | 172  |
| N(1)–H(1C)···O(43)   | 0.89   | 2.46     | 2.8755   | 109  |
| N(2)–H(2A)···O(49)   | 0.89   | 2.38     | 3.0350   | 131  |
| N(2)–H(2A)···O(50)   | 0.89   | 1.98     | 2.7949   | 151  |
| N(2)–H(2B)···O(47)   | 0.89   | 2.25     | 2.8686   | 126  |
| N(2)–H(2B)···O(48)   | 0.89   | 2.04     | 2.8487   | 151  |
| N(2)–H(2C)···O(51)   | 0.89   | 2.23     | 2.9060   | 133  |
| N(2)–H(2C)···O(52)   | 0.89   | 2.05     | 2.8308   | 146  |
| N(3)–H(3A)···O(56)   | 0.89   | 2.34     | 2.8334   | 115  |
| N(3)–H(3A)···O(57)   | 0.89   | 1.99     | 2.8467   | 160  |
| N(3)–H(3B)···O(53)   | 0.89   | 1.98     | 2.8500   | 166  |
| N(3)–H(3B)···O(58)   | 0.89   | 2.30     | 2.8459   | 119  |
| N(3)–H(3C)···O(54)   | 0.89   | 2.40     | 2.9322   | 119  |
| N(3)–H(3C)···O(55)   | 0.89   | 2.01     | 2.8690   | 162  |
| C(7)–H(7A)···O(5)    | 0.97   | 2.50     | 3.4059   | 156  |
| C(10)–H(10B)···O(15) | 0.97   | 2.52     | 3.2307   | 130  |
| C(13)–H(13A)···O(38) | 0.97   | 2.42     | 3.3482   | 159  |
| C(13)–H(13B)···O(37) | 0.97   | 2.46     | 3.3964   | 161  |
| C(30)–H(30A)···O(38) | 0.97   | 2.57     | 3.4968   | 160  |
| C(35)–H(35A)···O(20) | 0.97   | 2.45     | 3.3367   | 153  |
| C(36)–H(36B)···O(21) | 0.97   | 2.55     | 3.3609   | 141  |
| C(38)–H(38B)···O(17) | 0.97   | 2.54     | 3.0385   | 112  |
| C(53)–H(53A)···O(27) | 0.97   | 2.29     | 3.1566   | 148  |
| C(62)–H(62)···O(57)  | 0.93   | 2.49     | 3.2498   | 139  |
| C(67)–H(67A)···O(5)  | 0.96   | 2.39     | 3.3053   | 159  |
| C(67)–H(67B)···N(1)  | 0.96   | 2.62     | 3.5763   | 174  |
| C(69)–H(69B)···O(11) | 0.96   | 2.56     | 3.1801   | 122  |
| C(69)–H(69B)···O(28) | 0.96   | 2.52     | 3.4659   | 168  |

**Table S4.** Weak intermolecular interaction of the crystal **4** (Å, °).

| D–H···A              | d(N–H) | d(H···A) | d(D···A) | ∠DHA |
|----------------------|--------|----------|----------|------|
| N(2)–H(2A)···O(36)   | 0.86   | 2.58     | 3.0431   | 115  |
| N(2)–H(2A)···O(45)   | 0.86   | 2.29     | 3.1178   | 161  |
| N(3)–H(3)···O(43)    | 0.86   | 2.23     | 2.8789   | 132  |
| N(3)–H(3)···O(44)    | 0.86   | 2.26     | 2.9239   | 135  |
| N(4)–H(4A)···O(11)   | 0.86   | 2.30     | 2.9503   | 133  |
| N(4)–H(4B)···O(41)   | 0.86   | 2.19     | 2.9846   | 153  |
| N(5)–H(5A)···O(49)   | 0.86   | 2.46     | 2.9349   | 116  |
| N(5)–H(5A)···O(50)   | 0.86   | 2.14     | 2.8696   | 143  |
| N(6)–H(6A)···O(32)   | 0.86   | 2.58     | 3.0899   | 119  |
| N(6)–H(6A)···O(52)   | 0.86   | 2.15     | 2.9964   | 169  |
| N(1)–H(20)···O(47)   | 0.86   | 2.55     | 3.0012   | 113  |
| N(1)–H(20)···O(48)   | 0.86   | 1.95     | 2.7769   | 162  |
| C(20)–H(1)···O(42)   | 0.93   | 2.25     | 3.1198   | 156  |
| C(2)–H(2)···O(37)    | 0.93   | 2.53     | 3.4003   | 157  |
| C(7)–H(7B)···O(12)   | 0.97   | 2.51     | 3.4489   | 163  |
| C(11)–H(11B)···O(13) | 0.97   | 2.58     | 3.4652   | 152  |
| C(11)–H(11B)···O(22) | 0.97   | 2.59     | 3.4123   | 142  |
| C(15)–H(15A)···O(39) | 0.97   | 2.55     | 3.4675   | 159  |
| C(16)–H(16B)···O(37) | 0.97   | 2.57     | 3.3743   | 140  |
| C(19)–H(17)···O(46)  | 0.93   | 2.60     | 3.2063   | 124  |
| C(17)–H(19)···O(51)  | 0.93   | 2.47     | 3.3235   | 152  |
| C(25)–H(25)···O(20)  | 0.93   | 2.29     | 3.1656   | 156  |
| C(26)–H(26)···O(14)  | 0.93   | 2.46     | 3.1203   | 128  |
| C(29)–H(29)···O(6)   | 0.93   | 2.51     | 3.3478   | 149  |
| C(34)–H(34B)···O(6)  | 0.97   | 2.47     | 3.2156   | 134  |
| C(36)–H(36A)···O(35) | 0.97   | 2.54     | 3.4439   | 155  |
| C(37)–H(37B)···O(40) | 0.97   | 2.58     | 3.4776   | 155  |
| C(39)–H(39A)···O(37) | 0.97   | 2.57     | 3.3354   | 136  |
| C(39)–H(39B)···O(28) | 0.97   | 2.53     | 3.3172   | 138  |
| C(42)–H(42A)···O(35) | 0.97   | 2.57     | 3.4387   | 149  |
| C(43)–H(43)···O(51)  | 0.93   | 2.59     | 3.3217   | 136  |
| C(45)–H(45)···O(27)  | 0.93   | 2.35     | 3.1253   | 141  |

**Table S5.** Weak intermolecular interaction of the crystal **5** (Å, °).

| D–H···A              | d(N–H) | d(H···A) | d(D···A) | ∠DHA |
|----------------------|--------|----------|----------|------|
| N(1)–H(1A)···O(43)   | 0.86   | 2.30     | 2.7896   | 116  |
| N(1)–H(1B)···O(41)   | 0.86   | 2.15     | 2.9848   | 163  |
| N(1)–H(1B)···O(42)   | 0.86   | 2.32     | 2.8472   | 120  |
| N(2)–H(2A)···O(46)   | 0.86   | 2.08     | 2.8580   | 150  |
| N(2)–H(2A)···O(47)   | 0.86   | 2.42     | 3.0738   | 133  |
| C(2)–H(2)···O(26)    | 0.93   | 2.51     | 3.3897   | 157  |
| C(9)–H(9A)···O(7)    | 0.97   | 2.54     | 3.3347   | 139  |
| C(11)–H(11A)···O(48) | 0.97   | 2.50     | 3.3588   | 147  |
| C(21)–H(21B)···O(9)  | 0.97   | 2.55     | 3.5021   | 166  |
| C(26)–H(26A)···O(12) | 0.97   | 2.52     | 3.1100   | 120  |
| C(27)–H(27A)···O(3)  | 0.97   | 2.55     | 3.4462   | 153  |
| C(28)–H(28A)···O(21) | 0.97   | 2.40     | 3.3157   | 157  |
| C(30)–H(30)···O(48)  | 0.93   | 2.17     | 3.0699   | 163  |
| C(32)–H(32)···O(17)  | 0.93   | 2.58     | 3.1859   | 123  |
| C(33)–H(33)···O(17)  | 0.93   | 2.58     | 3.1808   | 123  |
| C(34)–H(34A)···O(32) | 0.97   | 2.59     | 3.3736   | 138  |
| C(41)–H(41B)···O(16) | 0.96   | 2.43     | 3.2917   | 150  |
| C(46)–H(46A)···O(19) | 0.97   | 2.51     | 2.9783   | 110  |
| C(46)–H(46B)···O(19) | 0.97   | 2.58     | 2.9783   | 105  |
| C(47)–H(47B)···O(6)  | 0.97   | 2.57     | 3.1800   | 121  |

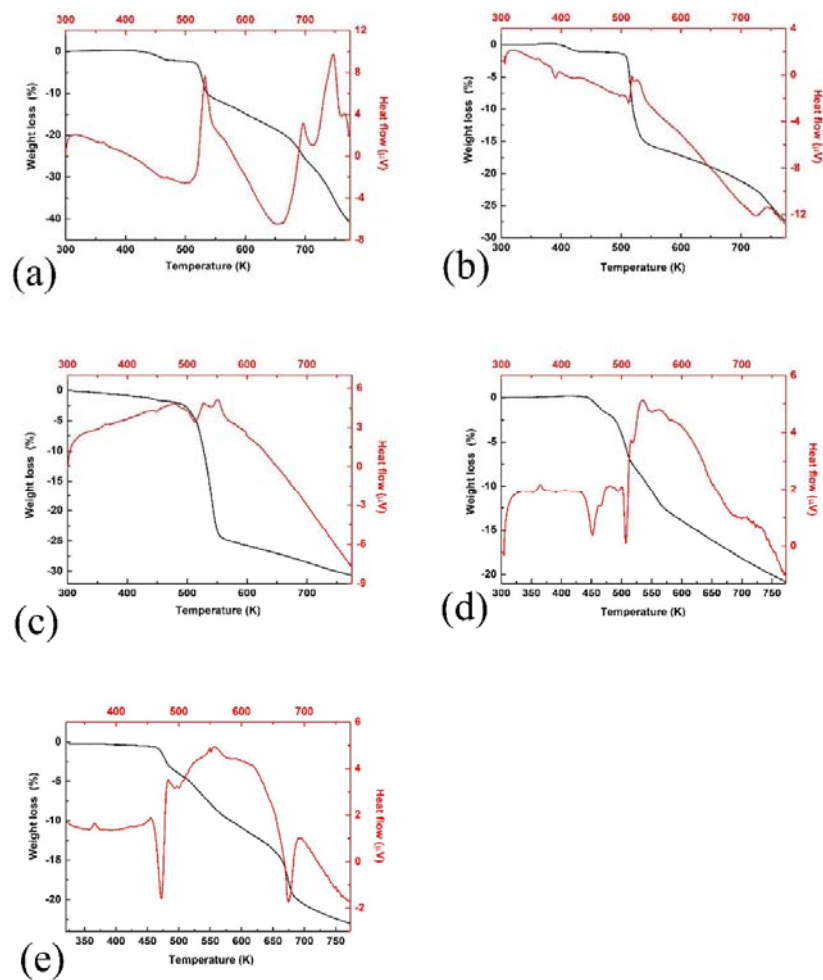

**Figure S2.** The TG-DTA curve of crystals **1 (a)**, **2 (b)**, **3 (c)**, **4 (d)** and **5 (e)**, respectively.

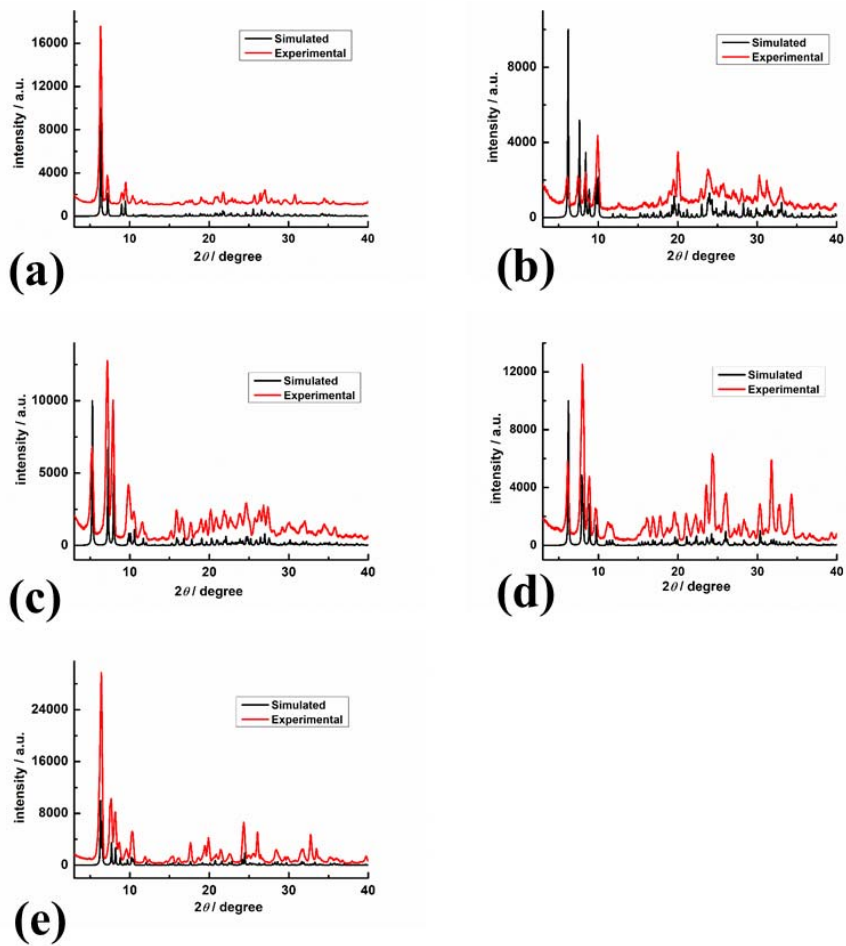

Figure S3. XRD patterns of crystal 1 (a), 2 (b), 3 (c), 4 (d) and 5 (e), respectively.



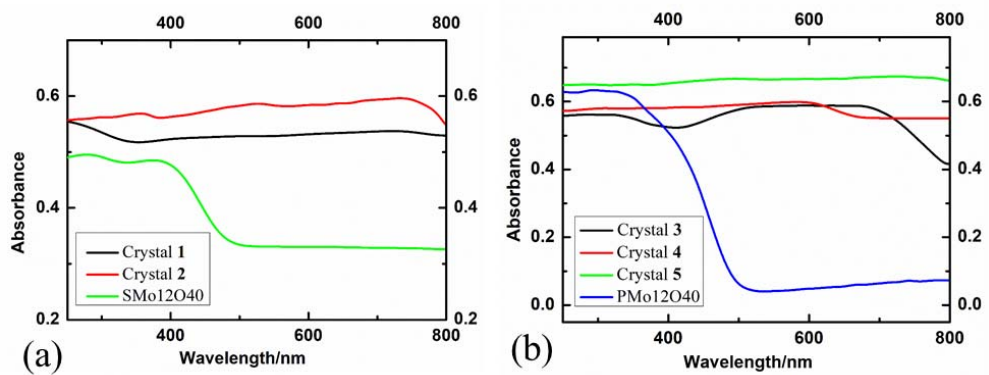

**Figure S4.** Diffuse reflectance spectra of crystals 1-5. (a) Crystals based on SMO<sub>12</sub>O<sub>40</sub>; (b) Crystals based on PMO<sub>12</sub>O<sub>40</sub>.
